# Supplementary material
Source: PubMed Central journal article supplement (PMC4961558)
Supplement: NIHMS795307-supplement-Legacy_Supplemental_File.pdf [file NIHMS795307-supplement-Legacy_Supplemental_File.pdf]

# AHA Journals -- Acknowledgment Permission Form

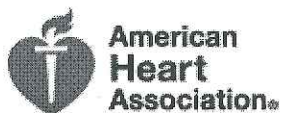

Journal

Manuscript No.

First author

Title of work

## Acknowledgment Permission:

Authors must provide written permission/approval from all individuals mentioned by name in the Acknowledgements section of a submitted manuscript. By signing this form, any and all acknowledged persons therefore state that they have read and approved the mention of their names in the Acknowledgment section of the aforementioned paper.

Printed Name Cynthia Roberts

Signature *Cynthia Roberts*

Date *3-29-16*

Printed Name Min Wei

Signature *Min Wei*

Date *3-28-16*

Printed Name Qing-e Lu

Signature *Qing-e Lu*

Date *3-28-16*

Printed Name Sutapa Santra

Signature *Sutapa Santra*

Date *3-28-16*
